# Supplementary material for: Sweat glucose and GLUT2 expression in atopic dermatitis: Implication for clinical manifestation and treatment
Source: PubMed Central journal article supplement (PMC5909908; doi:10.1371/journal.pone.0195960), 2018-04-20
Supplement: pone.0195960.s002.pdf [file pone.0195960.s002.pdf]

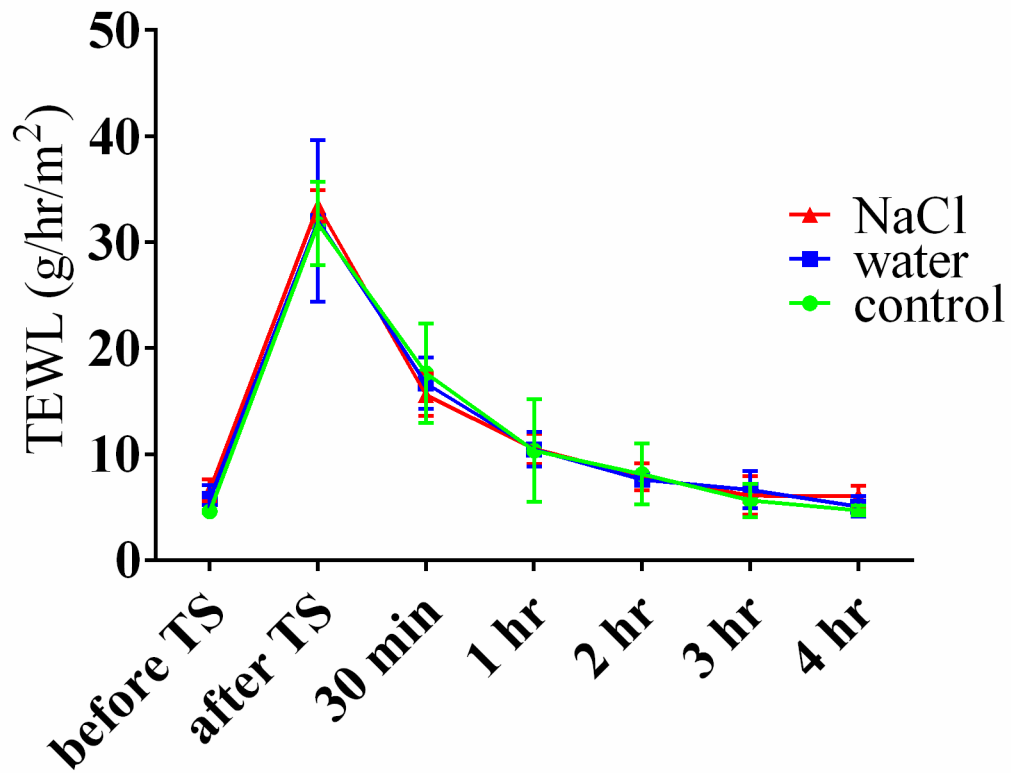

**S2 Fig. Impact of osmolarity control solution application on barrier recovery.**

NaCl solution with the same osmotic pressure as the glucose solution (33 mg/l; 0.199mOsm/Kg) was used in the same experiment as that in Fig3. n=3 per group.
