# Supplementary material for: Sweat glucose and GLUT2 expression in atopic dermatitis: Implication for clinical manifestation and treatment
Source: PubMed Central journal article supplement (PMC5909908; doi:10.1371/journal.pone.0195960), 2018-04-20
Supplement: pone.0195960.s006.pdf [file pone.0195960.s006.pdf]

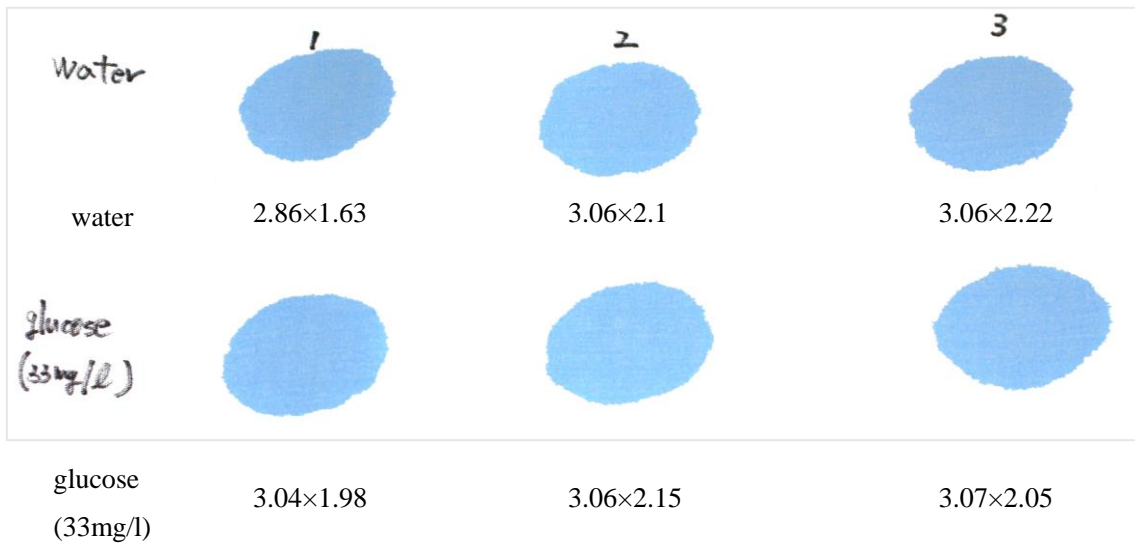

### S6 Fig. Spreading of glucose solution

The area of spreading of the solutions tested in Fig 3 and S2 Fig were measured using a water-colorimetric hydrochromic sheet. Each solution was applied in triplicate. There was no apparent difference in the measured spread of the glucose solution and vehicle (water).
