# Supplementary material for: Sweat glucose and GLUT2 expression in atopic dermatitis: Implication for clinical manifestation and treatment
Source: PubMed Central journal article supplement (PMC5909908; doi:10.1371/journal.pone.0195960), 2018-04-20
Supplement: pone.0195960.s008.pdf [file pone.0195960.s008.pdf]

**S1 Table. Properties of sweat from healthy subjects**

| Case | Age/<br>sex | pH   | Glucose<br>(mg/l) | LL37<br>(ng/ml) | Dermcidin<br>(ng/ml) | $\beta$ -defensin<br>(pg/ml) | Protein<br>(ng/ml) | Sodium<br>(ppm) | Salt<br>(%) |
|------|-------------|------|-------------------|-----------------|----------------------|------------------------------|--------------------|-----------------|-------------|
| 1    | 44/M        | 6.9  | 0.9               | 0               | 0.5                  | 46                           | 0.9                | 2300            | 0.58        |
| 2    | 36/M        | 7.8  | 0.045             | 0.01            | 0.5                  | 49                           | 0.917              | 1400            | 0.36        |
| 3    | 28/M        | 7.7  | 0.9               | 0               | 0.55                 | 56                           | 1.259              | 1700            | 0.44        |
| 4    | 28/M        | 7.92 | 0.9               | 0               | 0.01                 | 58                           | 1.914              | 2800            | 0.33        |
| 5    | 35/M        | 7.43 | 1.8               | 0               | 0.05                 | 57                           | 1.786              | 2100            | 0.34        |
| 6    | 38/M        | 7.66 | 1.8               | 0               | 0                    | 49                           | 1.156              | 2200            | ND          |
| 7    | 32/F        | 4.79 | 0.9               | ND              | ND                   | ND                           | 1.287              | 500             | 0.09        |
| 8    | 35/F        | 7.4  | 0.045             | ND              | ND                   | ND                           | 1.304              | 1500            | 0.31        |
| 9    | 61/F        | 7.13 | 0.9               | ND              | ND                   | ND                           | 1.327              | 1600            | 0.24        |
| 10   | 84/F        | 6.81 | 1.8               | ND              | ND                   | ND                           | 1.309              | 1300            | 0.23        |

\*Key: M, male; F, female; ND, not done
