# Supplementary material for: Sweat glucose and GLUT2 expression in atopic dermatitis: Implication for clinical manifestation and treatment
Source: PubMed Central journal article supplement (PMC5909908; doi:10.1371/journal.pone.0195960), 2018-04-20
Supplement: pone.0195960.s009.pdf [file pone.0195960.s009.pdf]

**S2 Table. Properties of sweat from patients with other dermatoses\***

| Case | Age/<br>sex | Diagnosis                         | pH   | Glucose<br>(mg/l) | LL37<br>(ng/ml) | Dermcidin<br>(ng/ml) | $\beta$ -defensin<br>(pg/ml) | Protein<br>(ng/ml) | Sodium<br>(ppm) | Salt<br>(%) |
|------|-------------|-----------------------------------|------|-------------------|-----------------|----------------------|------------------------------|--------------------|-----------------|-------------|
| 1    | 34/F        | Systemic<br>contact<br>dermatitis | 4.50 | 0.9               | 0.4             | 0                    | 300                          | 0.163              | 430             | 0.08        |
| 2    | 55/F        | Chronic<br>urticaria              | 5.53 | 0.9               | 0.4             | 0.2                  | 0                            | 1.007              | 1300            | 0.19        |
| 3    | 38/F        | Asteatotic<br>eczema              | 7.58 | 1.8               | ND              | ND                   | ND                           | 2.231              | 1900            | 0.29        |
| 4    | 49/F        | Chronic<br>urticaria              | 7.04 | 0.9               | ND              | ND                   | ND                           | 4.427              | 2600            | 0.39        |
| 5    | 40/F        | Palmoplantar<br>pustulosis        | 5.52 | 0.045             | ND              | ND                   | ND                           | 1.014              | 1300            | 0.2         |
| 6    | 78/M        | Prurigo<br>nodularis              | ND   | 0.9               | 0               | 0                    | 0                            | ND                 | 1300            | 0.2         |

\*Key: M, male; F, female; ND, not done
