# Supplementary material for: Sweat glucose and GLUT2 expression in atopic dermatitis: Implication for clinical manifestation and treatment
Source: PubMed Central journal article supplement (PMC5909908; doi:10.1371/journal.pone.0195960), 2018-04-20
Supplement: pone.0195960.s010.pdf [file pone.0195960.s010.pdf]

**S3 Table. Treatment of the AD patients**

| case | Glucose<br>(mg/l) | SCORAD | Topical treatment   |                            | Oral medicine |
|------|-------------------|--------|---------------------|----------------------------|---------------|
|      |                   |        | Face                | Body                       |               |
| 1    | 18.9              | 53.8   | Mild corticosteroid | Very strong corticosteroid | (-)           |
| 2    | 2.25              | 38     | Mild corticosteroid | Very strong corticosteroid | (-)           |
| 3    | 52.2              | 70.8   | Mild corticosteroid | Very strong corticosteroid | Antihistamine |
| 4    | 1.8               | 36.6   | Mild corticosteroid | Strong corticosteroid      | Antihistamine |
| 5    | 88.2              | 64.1   | Tacrolimus          | Very strong corticosteroid | Antihistamine |
| 6    | 0.9               | 45.6   | Mild corticosteroid | Very strong corticosteroid | Antihistamine |
| 7    | 94.5              | 64.5   | Mild corticosteroid | Very strong corticosteroid | Antihistamine |
| 8    | 1.8               | 36.9   | Mild corticosteroid | Strong corticosteroid      | Antihistamine |
| 9    | 135               | 61     | Ketoconazole        | Very strong corticosteroid | Antihistamine |
| 10   | 2.7               | 36.9   | Mild corticosteroid | Very strong corticosteroid | Antihistamine |
| 11   | 10.8              | 51.9   | Tacrolimus          | Very strong corticosteroid | Antihistamine |
| 12   | 108               | 77     | Tacrolimus          | Very strong corticosteroid | Antihistamine |
| 13   | 2.7               | 35.2   | Mild corticosteroid | Very strong corticosteroid | Antihistamine |
| 14   | 76.5              | 72.9   | Moisturizer         | Very strong corticosteroid | Antihistamine |
| 15   | 1.8               | 65.1   | Tacrolimus          | Mild corticosteroid        | Antihistamine |
| 16   | 1.8               | 68.5   | Moisturizer         | Moisturizer                | Antihistamine |
| 17   | 1.8               | 58.7   | Moisturizer         | Strong corticosteroid      | Antihistamine |
| 18   | 97.2              | 84     | Tacrolimus          | Strong corticosteroid      | Antihistamine |
| 19   | 0.9               | 35.9   | Tacrolimus          | Strong corticosteroid      | Antihistamine |
| 20   | 1.8               | 92     | Moisturizer         | Moisturizer                | Antihistamine |
| 21   | 2.7               | 54.5   | Mild corticosteroid | Strong corticosteroid      | Antihistamine |

\*Key: SCORAD, SCORing Atopic Dermatitis.
