# Supplementary material for: Sweat glucose and GLUT2 expression in atopic dermatitis: Implication for clinical manifestation and treatment
Source: PLOS journal article supplement (doi:10.1371/journal.pone.0195960), 2018-04-20
Supplement: S11 (10.1371/journal.pone.0195960.s011) [file journal.pone.0195960.s011]

**S4 Table. Concrete data of the transepidermal water loss (TEWL) values in Fig 3b (1st) and S1 Fig (2nd)\***

| Time related to tape-stripping (TS) treatment |     | Control (n=3) | Water (n=3) | Glucose (n=3) |
|-----------------------------------------------|-----|---------------|-------------|---------------|
| Before TS                                     | 1st | 4.6±0.95      | 6.5±1.6     | 4.9±0.9       |
|                                               | 2nd | 7.5±0.31      | 7.1±0.74    | 8.0±0.78      |
| After TS                                      | 1st | 66.7±15.2     | 65±24.7     | 65.6±15.8     |
|                                               | 2nd | 53.2±41.29    | 49.6±16.49  | 71.6±23.51    |
| 30 min post TS                                | 1st | 38.2±18.7     | 54.7±14.5   | 88.8±10.4     |
|                                               | 2nd | 10.1±5.8      | 22.8±19.64  | 56.0±18.67    |
| 1 h post TS                                   | 1st | 30.5±24.8     | 42.4±12     | 38.7±27.9     |
|                                               | 2nd | 7.37±2.07     | 20.47±16.45 | 38.7±13.11    |
| 2 h post TS                                   | 1st | 27.8±14       | 39.9±13.6   | 28.9±13.4     |
|                                               | 2nd | 5.07±0.85     | 19.4±14.74  | 27.43±7.9     |
| 3 h post TS                                   | 1st | 23.6±15       | 28.2±6.6    | 27.8±5        |
|                                               | 2nd | 6.43±         | 12.13±4.8   | 18.37±1.6     |
| 4 h post TS                                   | 1st | 21.1±12.5     | 27±10.9     | 22.2±15.2     |
|                                               | 2nd | 4.17±1.39     | 7.63±2.92   | 11.27±5       |

\*Values are expressed as mean±SD (g/h/m<sup>2</sup>).
